# Supplementary material for: Effects of Renal Ischemic Postconditioning on Myocardial Ultrastructural Organization and Myocardial Expression of Bcl-2/Bax in Rabbits
Source: Hindawi journal article supplement (doi:10.1155/2016/9349437), 2016-01-01
Supplement: f1 [file 9349437.f1.pdf]

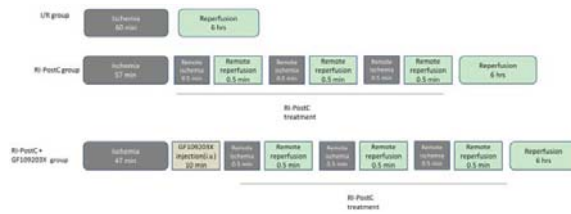

584

585 **Fig S1. Schematic of the experimental design, showing the protocol used for each**

586 **group of animals.**

587

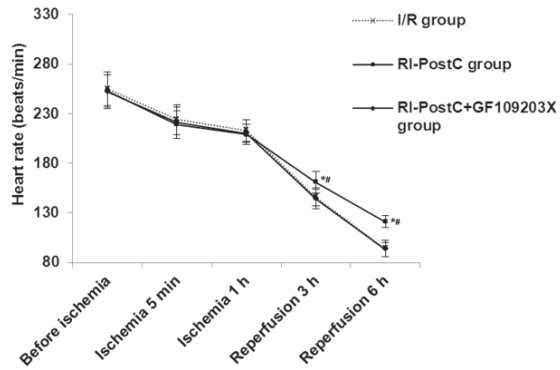

588

589 **Fig S2. Changes in heart rate during ischemia-reperfusion.** Mean heart rate was

590 compared between the 3 groups (n = 12) at 5 time points: before ischemia, after 5 min

591 of ischemia, after 1 h of ischemia, after 3 h of reperfusion and after 6 h of reperfusion.

592 \*  $P < 0.05$  compared with the IR group; #  $P < 0.05$  compared with the

593 RI-PostC+GF109203X group.

594

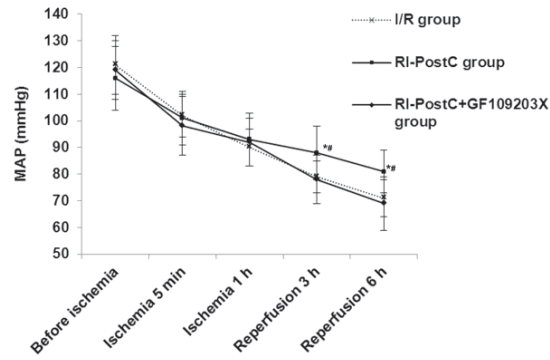

595

596 **Fig S3. Changes in MAP during ischemia-reperfusion.** MAP was compared  
 597 between the 3 groups (n = 12) at 5 time points: before ischemia, after 5 min of  
 598 ischemia, after 1 h of ischemia, after 3 h of reperfusion and after 6 h of reperfusion. \*  
 599  $P < 0.05$  compared with the IR group; #  $P < 0.05$  compared with the  
 600 RI-PostC+GF109203X group.
